# Supplementary material for: Continuous one-pot synthesis of sandwich structured core–shell particles and transformation to yolk–shell particles
Source: Royal Society of Chemistry journal article supplement (doi:10.1039/c3cc41355a), 2013-01-01
Supplement: c3cc41355a.pdf [file c3cc41355a.pdf]

## *Supporting Information*

# **Continuous One-Pot Synthesis of Sandwich Structured Core-Shell Particles and Transformation to Yolk-Shell Particles**

**You Na Ko,<sup>ab</sup> Yun Chan Kang\*<sup>a</sup> and Seung Bin Park<sup>b</sup>**

<sup>a</sup>Department of Chemical Engineering, Konkuk University, 1 Hwayang-dong, Gwangjin-gu, Seoul 143-701, Korea. Fax: +82-2-458-3504; Tel: +82-2-2049-6010

<sup>b</sup>Department of Chemical and Biomolecular Engineering, Korea Advanced Institute of Science and Technology, 291 Daehak-ro, Yuseong-gu, Daejeon 305-701, Korea

### **This file includes:**

- Nitrogen adsorption-desorption isotherm and pore size distribution.
- Schematic diagram of ultrasonic spray pyrolysis process.
- Detailed experimental procedure
- XRD pattern of the the 20/60/20 (wt%) Pd/V<sub>2</sub>O<sub>5</sub>/SiO<sub>2</sub> core-shell particles.

**Nitrogen adsorption-desorption isotherm and pore size distribution:**

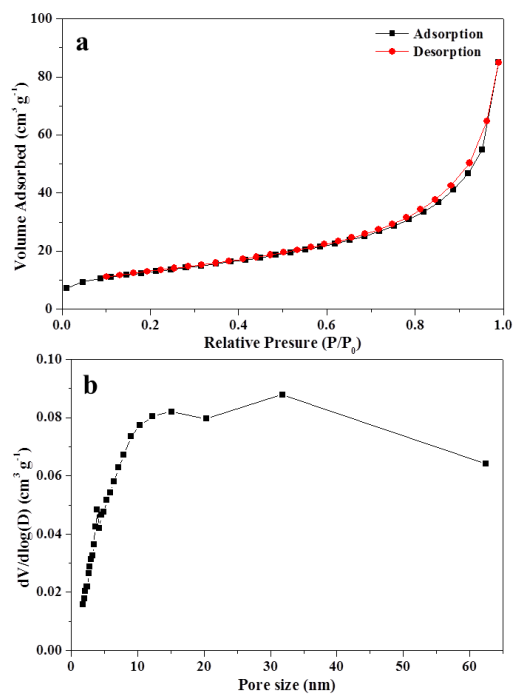

**Fig. S1** (a) Nitrogen adsorption-desorption isotherms plot and (b) pore size distribution plot of the Pd@SiO<sub>2</sub> yolk-shell particles.

### Detailed experimental procedure:

The ultrasonic spray pyrolysis system shown in Fig. S1 consisted of a droplet generator, quartz reactor, and powder collector. A 1.7 MHz ultrasonic nebulizer with six vibrators was used to simultaneously generate a large quantity of droplets, which were carried into the high-temperature tubular reactor by air at a flow rate of 10 L min<sup>-1</sup>. The length and diameter of the quartz reactor are 1200 and 50 mm, respectively. The tubular reactor with a heat zone of 60 cm was employed and the reactor temperature was fixed at 1000°C. The formed particles were collected by a Teflon bag filter.

V<sub>2</sub>O<sub>5</sub>/SiO<sub>2</sub> core-shell particles and sandwich structured Pd/V<sub>2</sub>O<sub>5</sub>/SiO<sub>2</sub> core-shell particles were directly prepared from an aqueous spray solution using ultrasonic spray pyrolysis. The precursor solutions were prepared by dissolving a weight ratio of 0:80:20, 5:75:20, and 20:60:20 palladium, vanadium, and silica precursors in distilled water and nitric acid with heating. Pd(NO<sub>3</sub>)<sub>2</sub>•nH<sub>2</sub>O (n=2.4, Kojima, 99%), V<sub>2</sub>O<sub>5</sub> (Junsei, 99%), and tetraethyl orthosilicate (TEOS) (Samchun, 98%) were used as the source materials for Pd, V, and Si, respectively. The concentrations of the metal salts were fixed at 0.1 M. Hollow SiO<sub>2</sub> particles and Pd@SiO<sub>2</sub> yolk-shell particles were obtained by washing the collected particles in distilled water to eliminate V<sub>2</sub>O<sub>5</sub> components and centrifugation. The core-shell powders were added into distilled water at a 1:10 weight ratio to remove V<sub>2</sub>O<sub>5</sub> inner layer. After boiling, the residual product was harvested by several rinse-centrifugation cycles with distilled water.

The crystal structures of the particles were investigated using X-ray diffractometry (XRD) with CuK $\alpha$  radiation ( $\lambda = 1.5418 \text{ \AA}$ ). Morphological characteristics were investigated via high-resolution transmission electron microscopy (HR-TEM).

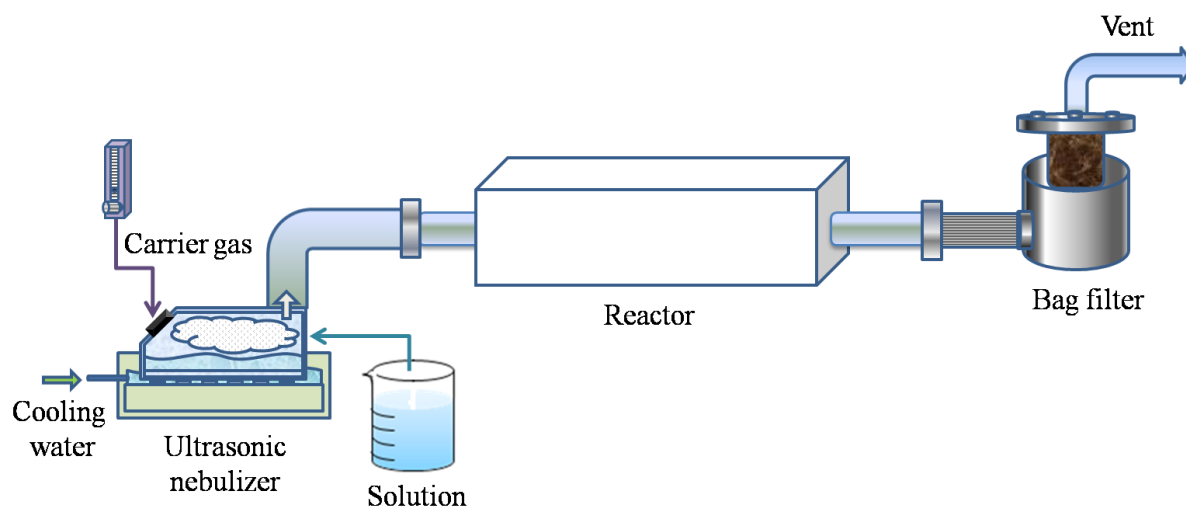

**Fig. S2** Schematic diagram of the ultrasonic spray pyrolysis process.

**XRD pattern of the the 20/60/20 (wt%) Pd/V<sub>2</sub>O<sub>5</sub>/SiO<sub>2</sub> core-shell particles:**

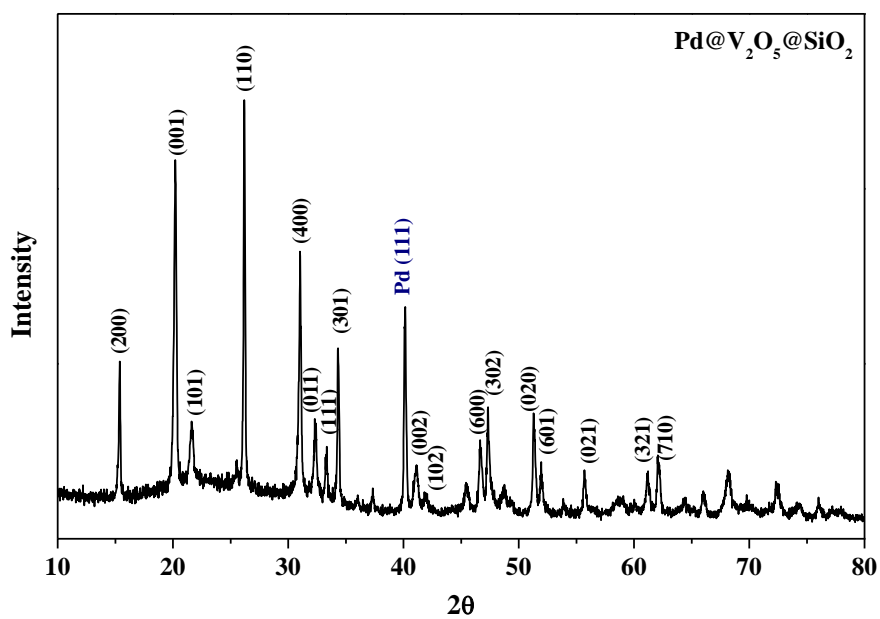

**Fig. S3** XRD pattern of 20/60/20 (wt%) Pd/V<sub>2</sub>O<sub>5</sub>/SiO<sub>2</sub> core-shell particles.
